# Supplementary material for: Locomotor resilience through load-dependent modulation of muscle co-contraction
Source: Oxford University Press journal article supplement (doi:10.1242/jeb.244361), 2022-08-30
Supplement: jeb244361supp.pdf [file jeb244361supp.pdf]

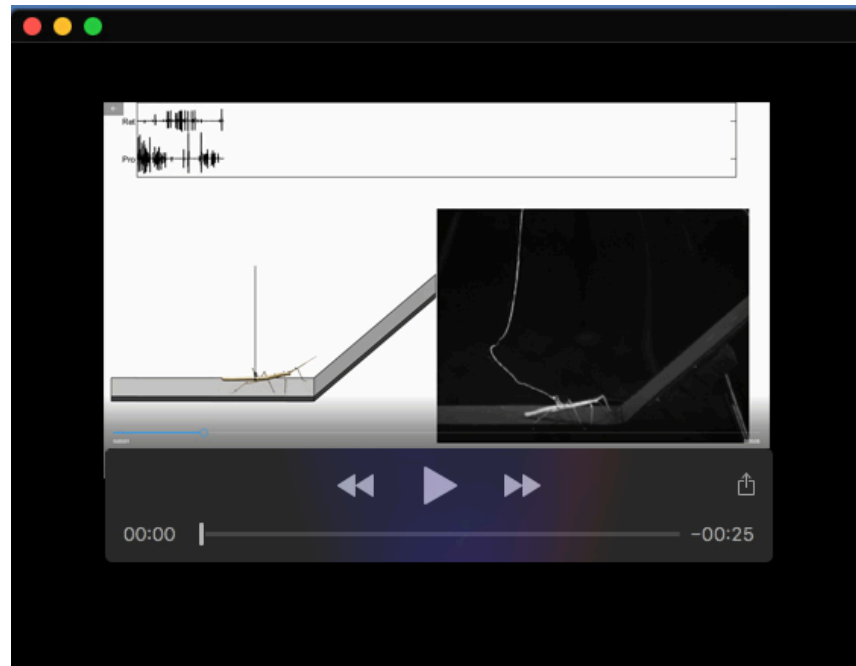

**Movie 1.** Illustration of the combined measurements of whole-body kinematics and muscle activity for the transition to upward walking. **(Top row)** Raw EMG recordings from antagonistic hind leg muscles retractor (Ret) and protractor (Pro). **(Left panel)** 3D motion-capture-based schematic animation of a stick insect walking freely along a walkway with a step-change in slope from level to +45° upward walking. **(Right panel)** Complementary, synchronized side-view video used for visual validation and movement annotation.

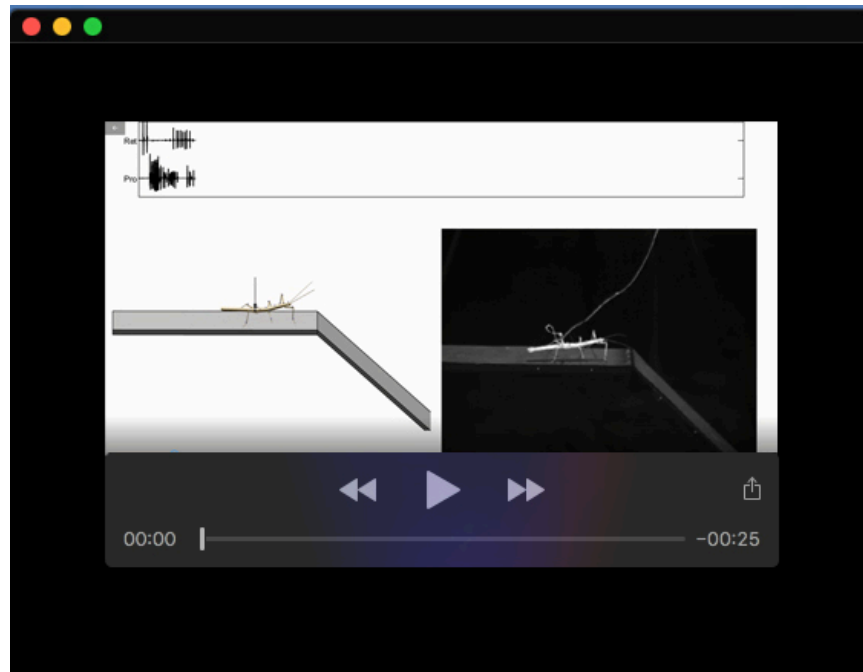

**Movie 2.** Illustration of the combined measurements of whole-body kinematics and muscle activity for the transition to downward walking. **(Top row)** Raw EMG recordings from antagonistic hind leg muscles retractor (Ret) and protractor (Pro). **(Left panel)** 3D motion-capture-based schematic animation of a stick insect walking freely along a walkway with a step-change in slope from level to  $-45^\circ$  downward walking. **(Right panel)** Complementary, synchronized side-view video used for visual validation and movement annotation.
